# Supplementary material
Source: publisher figshare collection journal article supplement (https://tandf.figshare.com/articles/dataset/_/1305083)
Supplement: Supplementary file 1 [file 1]

# Tuning parameter selection in penalized frailty models-supplementary material

E. Androulakis, C. Koukouvinos, F. Vonta

Department of Mathematics

National Technical University of Athens

Zografou 15773, Athens, Greece

## 1 Standard deviations

Table 1: Standard deviations for the Gamma frailty using the New Method and GCV

| Method            | $\hat{\beta}_1$ |        |            | $\hat{\beta}_4$ |        |            | $\hat{\beta}_7$ |        |            |
|-------------------|-----------------|--------|------------|-----------------|--------|------------|-----------------|--------|------------|
|                   | SD              | $SD_m$ | $SD_{mad}$ | SD              | $SD_m$ | $SD_{mad}$ | SD              | $SD_m$ | $SD_{mad}$ |
| n=50, J=2         |                 |        |            |                 |        |            |                 |        |            |
| SCAD(New Method)  | 0.1155          | 0.1177 | 0.0191     | 0.0993          | 0.1243 | 0.0166     | 0.1651          | 0.1702 | 0.0454     |
| SCAD(GCV)         | 0.1062          | 0.1177 | 0.0211     | 0.1115          | 0.1230 | 0.0166     | 0.1703          | 0.1533 | 0.0506     |
| LASSO(New Method) | 0.1049          | 0.1240 | 0.0142     | 0.1228          | 0.1347 | 0.0168     | 0.1282          | 0.1211 | 0.0149     |
| LASSO(GCV)        | 0.0977          | 0.0902 | 0.0110     | 0.1250          | 0.0973 | 0.0114     | 0.1371          | 0.0799 | 0.0126     |
| Hard(New Method)  | 0.0918          | 0.1091 | 0.0159     | 0.1143          | 0.1340 | 0.0171     | 0.1186          | 0.1262 | 0.0163     |
| Hard(GCV)         | 0.1057          | 0.1083 | 0.0420     | 0.1200          | 0.1059 | 0.0460     | 0.1324          | 0.1071 | 0.0194     |
| Oracle            | 0.0924          | 0.1257 | 0.0130     | 0.0986          | 0.1322 | 0.0161     | 0.1058          | 0.1281 | 0.0138     |
| n=50, J=5         |                 |        |            |                 |        |            |                 |        |            |
| SCAD(New Method)  | 0.0612          | 0.0849 | 0.0085     | 0.0803          | 0.0853 | 0.0072     | 0.0826          | 0.0834 | 0.0064     |
| SCAD(GCV)         | 0.0615          | 0.0834 | 0.0101     | 0.0781          | 0.0829 | 0.0105     | 0.0802          | 0.0814 | 0.0125     |
| LASSO(New Method) | 0.0689          | 0.0857 | 0.0089     | 0.0831          | 0.0888 | 0.0091     | 0.0790          | 0.0849 | 0.0076     |
| LASSO(GCV)        | 0.0732          | 0.0744 | 0.0072     | 0.0935          | 0.0766 | 0.0057     | 0.0627          | 0.0705 | 0.0064     |
| Hard(New Method)  | 0.0702          | 0.0849 | 0.0086     | 0.0883          | 0.0856 | 0.0081     | 0.0611          | 0.0846 | 0.0078     |
| Hard(GCV)         | 0.0585          | 0.0830 | 0.0092     | 0.0814          | 0.0832 | 0.0098     | 0.0422          | 0.0813 | 0.0091     |
| Oracle            | 0.0580          | 0.0848 | 0.0084     | 0.0827          | 0.0854 | 0.0070     | 0.0471          | 0.0837 | 0.0064     |
| n=100, J=2        |                 |        |            |                 |        |            |                 |        |            |
| SCAD(New Method)  | 0.0842          | 0.0960 | 0.0071     | 0.0730          | 0.0950 | 0.0070     | 0.0796          | 0.0910 | 0.0085     |
| SCAD(GCV)         | 0.0805          | 0.0930 | 0.0082     | 0.0720          | 0.0926 | 0.0081     | 0.1081          | 0.0840 | 0.0128     |
| LASSO(New Method) | 0.0722          | 0.0996 | 0.0089     | 0.1105          | 0.1053 | 0.0111     | 0.0845          | 0.1061 | 0.0098     |
| LASSO(GCV)        | 0.0765          | 0.0981 | 0.0062     | 0.0915          | 0.0809 | 0.0054     | 0.0769          | 0.0725 | 0.0057     |
| Hard(New Method)  | 0.0836          | 0.0968 | 0.0083     | 0.0812          | 0.0967 | 0.0079     | 0.0784          | 0.0950 | 0.0081     |
| Hard(GCV)         | 0.0902          | 0.0819 | 0.0086     | 0.0752          | 0.0924 | 0.0092     | 0.0833          | 0.0897 | 0.0103     |
| Oracle            | 0.0866          | 0.0963 | 0.0072     | 0.0744          | 0.0959 | 0.0072     | 0.0742          | 0.0925 | 0.0079     |
| n=100, J=5        |                 |        |            |                 |        |            |                 |        |            |
| SCAD(New Method)  | 0.0393          | 0.0401 | 0.0043     | 0.0448          | 0.0598 | 0.0037     | 0.0438          | 0.0601 | 0.0037     |
| SCAD(GCV)         | 0.0325          | 0.0570 | 0.0071     | 0.0499          | 0.0566 | 0.0079     | 0.0554          | 0.0668 | 0.0069     |
| LASSO(New Method) | 0.0519          | 0.0633 | 0.0048     | 0.0534          | 0.0663 | 0.0055     | 0.0519          | 0.0661 | 0.0054     |
| LASSO(GCV)        | 0.0431          | 0.0544 | 0.0043     | 0.0447          | 0.0554 | 0.0028     | 0.0533          | 0.0524 | 0.0029     |
| Hard(New Method)  | 0.0392          | 0.0506 | 0.0042     | 0.0441          | 0.0612 | 0.0043     | 0.0491          | 0.0614 | 0.0038     |
| Hard(GCV)         | 0.0376          | 0.0599 | 0.0040     | 0.0447          | 0.0605 | 0.0039     | 0.0464          | 0.0606 | 0.0038     |
| Oracle            | 0.0385          | 0.0604 | 0.0039     | 0.0453          | 0.0604 | 0.0039     | 0.0464          | 0.0605 | 0.0038     |

Table 2: Standard deviations for the Inverse Gaussian frailty, using the New Method and GCV

| Method            | $\hat{\beta}_1$ |        |            | $\hat{\beta}_4$ |        |            | $\hat{\beta}_7$ |        |            |
|-------------------|-----------------|--------|------------|-----------------|--------|------------|-----------------|--------|------------|
|                   | SD              | $SD_m$ | $SD_{mad}$ | SD              | $SD_m$ | $SD_{mad}$ | SD              | $SD_m$ | $SD_{mad}$ |
| n=50, J=2         |                 |        |            |                 |        |            |                 |        |            |
| SCAD(New Method)  | 0.1291          | 0.1203 | 0.0119     | 0.1550          | 0.1394 | 0.0147     | 0.1861          | 0.1990 | 0.0215     |
| SCAD(GCV)         | 0.1406          | 0.1180 | 0.0161     | 0.1579          | 0.1161 | 0.0164     | 0.1943          | 0.1692 | 0.0515     |
| LASSO(New Method) | 0.1247          | 0.1215 | 0.0129     | 0.1553          | 0.1267 | 0.0143     | 0.1426          | 0.1222 | 0.0138     |
| LASSO(GCV)        | 0.1253          | 0.0945 | 0.0105     | 0.1475          | 0.0983 | 0.0105     | 0.1457          | 0.0844 | 0.0154     |
| Hard(New Method)  | 0.1416          | 0.1259 | 0.0148     | 0.1544          | 0.1217 | 0.0169     | 0.1263          | 0.1222 | 0.0212     |
| Hard(GCV)         | 0.1427          | 0.0926 | 0.0730     | 0.1682          | 0.0936 | 0.0535     | 0.1137          | 0.1276 | 0.0136     |
| Oracle            | 0.1276          | 0.1278 | 0.0112     | 0.1464          | 0.1232 | 0.0131     | 0.1137          | 0.1276 | 0.0136     |
| n=50, J=5         |                 |        |            |                 |        |            |                 |        |            |
| SCAD(New Method)  | 0.0657          | 0.0805 | 0.0074     | 0.0604          | 0.0827 | 0.0088     | 0.0733          | 0.0811 | 0.0086     |
| SCAD(GCV)         | 0.0601          | 0.0796 | 0.0086     | 0.0603          | 0.0791 | 0.0120     | 0.0946          | 0.0760 | 0.0117     |
| LASSO(New Method) | 0.0703          | 0.0794 | 0.0062     | 0.0714          | 0.0869 | 0.0086     | 0.0892          | 0.0838 | 0.0084     |
| LASSO(GCV)        | 0.0574          | 0.0675 | 0.0050     | 0.0627          | 0.0724 | 0.0074     | 0.0739          | 0.0655 | 0.0066     |
| Hard(New Method)  | 0.0614          | 0.0816 | 0.0076     | 0.0657          | 0.0842 | 0.0090     | 0.0686          | 0.0834 | 0.0077     |
| Hard(GCV)         | 0.0551          | 0.0798 | 0.0080     | 0.0641          | 0.0823 | 0.0103     | 0.0637          | 0.0812 | 0.0090     |
| Oracle            | 0.0542          | 0.0811 | 0.0072     | 0.0638          | 0.0837 | 0.0091     | 0.0600          | 0.0829 | 0.0076     |
| n=100, J=2        |                 |        |            |                 |        |            |                 |        |            |
| SCAD(New Method)  | 0.0795          | 0.0903 | 0.0077     | 0.0827          | 0.0925 | 0.0081     | 0.0887          | 0.0910 | 0.0081     |
| SCAD(GCV)         | 0.0770          | 0.0904 | 0.0083     | 0.0917          | 0.0909 | 0.0083     | 0.0812          | 0.0893 | 0.0113     |
| LASSO(New Method) | 0.0830          | 0.0906 | 0.0084     | 0.0951          | 0.0965 | 0.0086     | 0.0760          | 0.0922 | 0.0076     |
| LASSO(GCV)        | 0.0807          | 0.0759 | 0.0057     | 0.0813          | 0.0779 | 0.0052     | 0.0617          | 0.0718 | 0.0054     |
| Hard(New Method)  | 0.0837          | 0.0916 | 0.0075     | 0.0925          | 0.0932 | 0.0088     | 0.0796          | 0.0916 | 0.0077     |
| Hard(GCV)         | 0.0771          | 0.0885 | 0.0097     | 0.0876          | 0.0896 | 0.0095     | 0.0675          | 0.0900 | 0.0095     |
| Oracle            | 0.0774          | 0.0915 | 0.0074     | 0.0833          | 0.0924 | 0.0075     | 0.0608          | 0.0927 | 0.0077     |
| n=100, J=5        |                 |        |            |                 |        |            |                 |        |            |
| SCAD(New Method)  | 0.0441          | 0.0588 | 0.0039     | 0.0532          | 0.0588 | 0.0039     | 0.0520          | 0.0587 | 0.0045     |
| SCAD(GCV)         | 0.0507          | 0.0580 | 0.0055     | 0.0639          | 0.0571 | 0.0062     | 0.0591          | 0.0549 | 0.0059     |
| LASSO(New Method) | 0.0471          | 0.0589 | 0.0040     | 0.0631          | 0.0626 | 0.0048     | 0.0504          | 0.0606 | 0.0042     |
| LASSO(GCV)        | 0.0442          | 0.0522 | 0.0040     | 0.0535          | 0.0541 | 0.0036     | 0.0500          | 0.0506 | 0.0032     |
| Hard(New Method)  | 0.0425          | 0.0587 | 0.0041     | 0.0589          | 0.0611 | 0.0043     | 0.0466          | 0.0609 | 0.0043     |
| Hard(GCV)         | 0.0437          | 0.0587 | 0.0040     | 0.0557          | 0.0589 | 0.0039     | 0.0415          | 0.0591 | 0.0053     |
| Oracle            | 0.0439          | 0.0587 | 0.0040     | 0.0556          | 0.0587 | 0.0040     | 0.0414          | 0.0590 | 0.0042     |
