# Supplementary material
Source: publisher figshare collection journal article supplement (https://tandf.figshare.com/articles/dataset/_/1305083)
Supplement: Supplementary file 2 [file 1]

# Tuning parameter selection in penalized frailty models: Supplementary Material

E. Androulakis, C. Koukouvinos, F. Vonta

Department of Mathematics

National Technical University of Athens

Zografou 15773, Athens, Greece

Simulation results concerning the case when the  $x_i$  are marginally standard normal and the correlation between  $x_i$  and  $x_j$  is  $\rho^{|i-j|}$  with  $\rho = 0.8$ .

Table 1: Simulation results for the Gamma frailty

| Method     | GCV: MRME(%) | GCV: Aver. of 0 coeff. |           | New Method: MRME(%) | New Method: Aver. of 0 coeff. |           |
|------------|--------------|------------------------|-----------|---------------------|-------------------------------|-----------|
|            |              | correct                | incorrect |                     | correct                       | incorrect |
| n=50, J=2  |              |                        |           |                     |                               |           |
| SCAD       | 0.8700       | 4.3700                 | 0.2500    | 0.7655              | 4.5300                        | 0.1300    |
| LASSO      | 0.9340       | 3.6500                 | 0.1400    | 0.8462              | 3.8500                        | 0.1300    |
| Hard       | 0.8285       | 4.2100                 | 0.3100    | 0.7714              | 4.4700                        | 0.1100    |
| Oracle     | 0.6711       | 5                      | 0         | 0.6711              | 5                             | 0         |
| n=50, J=5  |              |                        |           |                     |                               |           |
| SCAD       | 0.7384       | 4.1000                 | 0.0100    | 0.6831              | 4.7500                        | 0.0100    |
| LASSO      | 0.9749       | 3.7200                 | 0.0100    | 0.8276              | 3.8600                        | 0.0100    |
| Hard       | 0.8380       | 4.4900                 | 0.0400    | 0.7304              | 4.6400                        | 0.0200    |
| Oracle     | 0.5916       | 5                      | 0         | 0.5916              | 5                             | 0         |
| n=100, J=2 |              |                        |           |                     |                               |           |
| SCAD       | 0.8463       | 4.1300                 | 0.0400    | 0.7549              | 4.4300                        | 0.0400    |
| LASSO      | 1.1062       | 3.1200                 | 0.0500    | 0.8513              | 3.4000                        | 0.0400    |
| Hard       | 0.8173       | 4.3400                 | 0.1600    | 0.7674              | 4.5900                        | 0.0800    |
| Oracle     | 0.6508       | 5                      | 0         | 0.6508              | 5                             | 0         |
| n=100, J=5 |              |                        |           |                     |                               |           |
| SCAD       | 0.7029       | 4.5300                 | 0.0400    | 0.5828              | 4.7800                        | 0         |
| LASSO      | 0.8499       | 3.4200                 | 0.0500    | 0.6915              | 3.7500                        | 0         |
| Hard       | 0.8374       | 4.1400                 | 0.1300    | 0.6935              | 4.5700                        | 0.0100    |
| Oracle     | 0.6116       | 5                      | 0         | 0.6116              | 5                             | 0         |

Table 2: Simulation results for the Inverse Gaussian frailty

| Method     | GCV: MRME(%) | GCV: Aver. of 0 coeff. |           | New Method: MRME(%) | New Method: Aver. of 0 coeff. |           |
|------------|--------------|------------------------|-----------|---------------------|-------------------------------|-----------|
|            |              | correct                | incorrect |                     | correct                       | incorrect |
| n=50, J=2  |              |                        |           |                     |                               |           |
| SCAD       | 0.6581       | 4.4700                 | 0.1200    | 0.5302              | 4.6100                        | 0.0800    |
| LASSO      | 0.7638       | 3.5800                 | 0.1400    | 0.6810              | 3.9800                        | 0.1000    |
| Hard       | 0.6680       | 4.4600                 | 0.3200    | 0.5053              | 4.6800                        | 0.1400    |
| Oracle     | 0.4755       | 5                      | 0         | 0.4755              | 5                             | 0         |
| n=50, J=5  |              |                        |           |                     |                               |           |
| SCAD       | 0.7924       | 4.3400                 | 0         | 0.6940              | 4.5300                        | 0         |
| LASSO      | 1.0976       | 3.5100                 | 0         | 0.9492              | 3.6200                        | 0         |
| Hard       | 0.8264       | 4.4600                 | 0.0200    | 0.7617              | 4.7000                        | 0.0100    |
| Oracle     | 0.5323       | 5                      | 0         | 0.5323              | 5                             | 0         |
| n=100, J=2 |              |                        |           |                     |                               |           |
| SCAD       | 0.9080       | 4.4100                 | 0.0800    | 0.8661              | 4.7000                        | 0.0100    |
| LASSO      | 1.2279       | 3.1000                 | 0.0100    | 1.0859              | 3.4400                        | 0.0100    |
| Hard       | 0.9804       | 4.3200                 | 0.1900    | 0.8720              | 4.5500                        | 0.0800    |
| Oracle     | 0.8187       | 5                      | 0         | 0.8187              | 5                             | 0         |
| n=100, J=5 |              |                        |           |                     |                               |           |
| SCAD       | 1.0553       | 4.2500                 | 0         | 0.8860              | 4.6100                        | 0         |
| LASSO      | 1.7017       | 3.7400                 | 0         | 1.0932              | 3.8200                        | 0         |
| Hard       | 0.8998       | 4.2800                 | 0.0500    | 0.8370              | 4.5500                        | 0         |
| Oracle     | 0.9254       | 5                      | 0         | 0.9254              | 5                             | 0         |
